# Supplementary material
Source: PubMed Central journal article supplement (PMC3356570)
Supplement: NIHMS376264-supplement-supplementary_figure_1.pdf [file NIHMS376264-supplement-supplementary_figure_1.pdf]

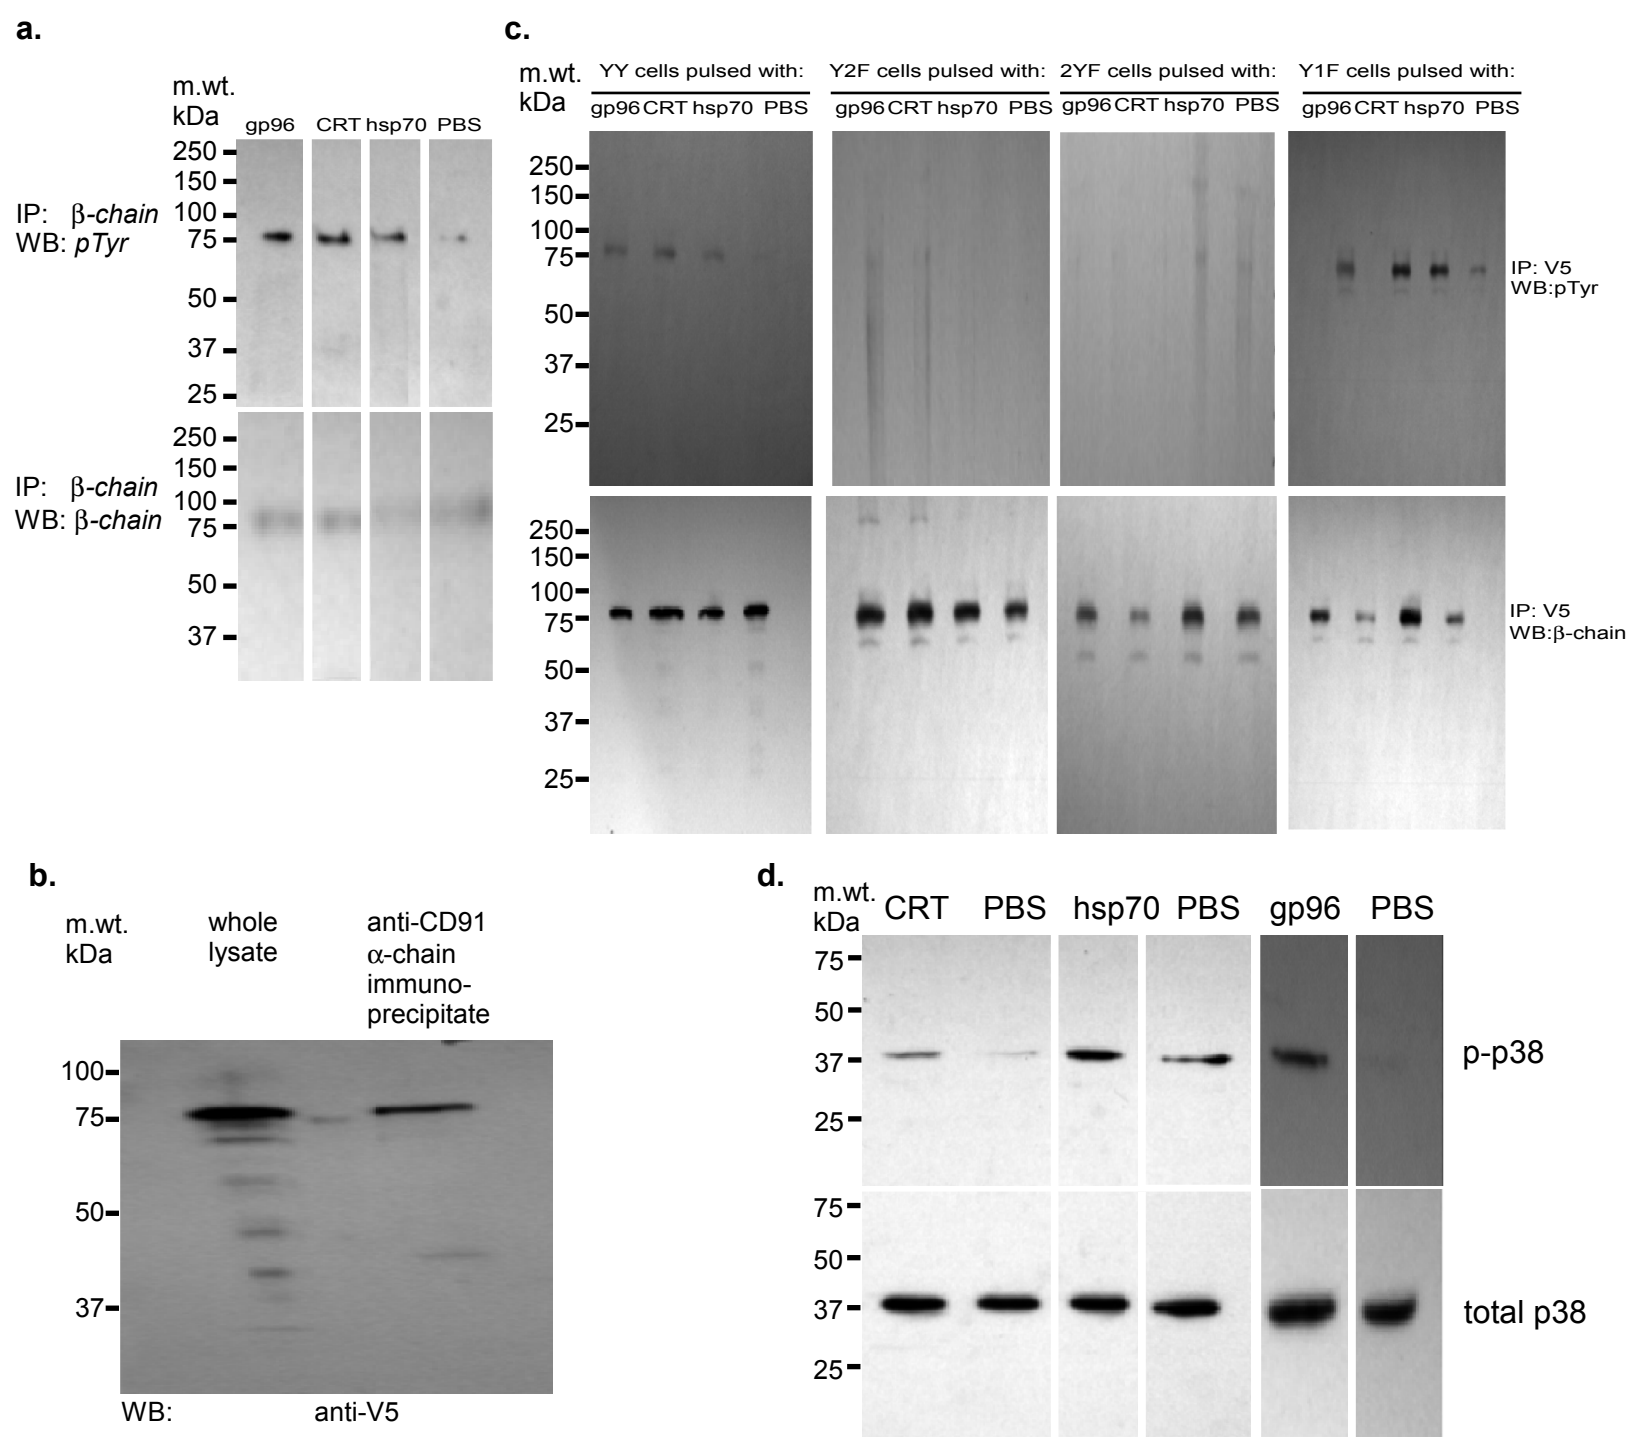

### Supplementary Figure S1. HSPs use alternative tyrosine phosphorylation sites on CD91

**a.** RAW264.7 cells were pulsed with gp96, CRT, hsp70 or PBS for 30 min and CD91 was immunoprecipitated with mouse anti-CD91  $\beta$ -chain antibody. Immunoprecipitates were probed with 4G10/PY20 anti-phosphotyrosine antibodies (pTyr) or with  $\beta$ -chain specific antibody ( $\beta$ -chain). **b.** The  $\alpha$ -chain of CD91 was immunoprecipitated from the cell lysate of RAW264.7 cells transfected with the representative  $\beta$ -chain YY construct using anti-CD91  $\alpha$ -chain antibody. The cell lysate and the immunoprecipitate were analyzed by SDS-PAGE and immunoblotted with anti-V5. Similar results were obtained with the other constructs. **c.** RAW264.7 cells transfected with wild type  $\beta$ -chain (YY) or with  $\beta$ -chain mutants (Y2F, 2YF or Y1F) were pulsed with gp96, CRT or hsp70 or PBS for 30 min. The  $\beta$ -chains were immunoprecipitated from cell lysates with anti-V5 antibody and probed for phospho-Tyr (pTyr) or  $\beta$ -chain. **d.** RAW264.7 was pulsed with gp96, CRT, hsp70 or PBS for 30 min and cell lysates obtained. The lysates were immunoblotted with anti-phospho-p38 (p-p38) and anti-p38 (total p38) antibodies. Data are representative of at least 3 independent experiments with similar results.
